# Supplementary material
Source: PubMed Central journal article supplement (PMC6597328)
Supplement: NIHMS1500566-supplement-1.pdf [file NIHMS1500566-supplement-1.pdf]

## Appendix

## Supplemental Table 1

*Factor loadings from the Friendship Questionnaire Items*

| Item (number)                                                                                                                                                | Scoring                                                     | Social Approach | Aggression/ Overarousal | Empathic Concern |
|--------------------------------------------------------------------------------------------------------------------------------------------------------------|-------------------------------------------------------------|-----------------|-------------------------|------------------|
| Child struggles with friendships... (because) he/she is really interested in making friends, but seems to not know how to do it (5b)                         | Yes=1, No=0                                                 | .81             |                         |                  |
| Child struggles with friendships... (because) he/she doesn't initiate conversation (5c)                                                                      | Yes=1, No=0                                                 | .84             |                         |                  |
| Child struggles with friendships... (because) he/she becomes too excited around other kids and has difficulty calming down (5d)                              | Yes=1, No=0                                                 |                 | .68                     |                  |
| Child struggles with friendships... (because) other kids think that he/she is likes to be "in charge" too often (5g)                                         | Yes=1, No=0                                                 |                 | .72                     |                  |
| Child struggles with friendships... (because) other kids think that he/she does not cooperate or share (5h)                                                  | Yes=1, No=0                                                 |                 | .60                     |                  |
| Does your child fight (verbally or physically) with other children? (8a)                                                                                     | Very often=3;<br>Occasionally=2;<br>Almost<br>Never=1; No=0 |                 | .67                     |                  |
| Does your child tease other children? (9)                                                                                                                    | Yes, very<br>much=2, Yes,<br>somewhat=1;<br>No=0            |                 | .62                     |                  |
| Does your child express empathy towards other children's suffering (i.e., does he or she feel very bad if a child is getting teased or has gotten hurt)? (6) | Yes, very<br>much=2, Yes,<br>somewhat=1;<br>No=0            |                 |                         | .87              |
| Does your child comfort children who are suffering? (7)                                                                                                      | Yes, very<br>much=2, Yes,<br>somewhat=1;<br>No=0            |                 |                         | .87              |

Note. Factor loadings appear for loadings greater than or equal to |.4|.
